# Supplementary material for: Hybrid Raman and Laser-Induced Breakdown Spectroscopy for Food Authentication Applications
Source: MDPI journal article supplement (doi:10.3390/molecules28166087), 2023-08-16
Supplement: s1 [file s1]

# Hybrid Raman and laser-induced breakdown spectroscopy for food authentication applications

**Sungho Shin<sup>1,\*</sup>, Iyll-Joon Doh<sup>1</sup>, Kennedy Okeyo<sup>2</sup>, Euiwon Bae<sup>3</sup>, J. Paul Robinson<sup>1,2</sup>, and Bartek Rajwa<sup>4,\*</sup>**

*<sup>1</sup>Department of Basic Medical Sciences, Purdue University, West Lafayette, IN 47907, USA*

*<sup>2</sup>Weldon School of Biomedical Engineering, Purdue University, West Lafayette, IN 47907, USA*

*<sup>3</sup>School of Mechanical Engineering, Purdue University, West Lafayette, IN 47907, USA*

*<sup>4</sup>Bindley Bioscience Center, Discovery Park, Purdue University, West Lafayette, IN 47907, USA*

*\*Corresponding author: shin331@purdue.edu; brajwa@purdue.edu*

## Supplementary Material

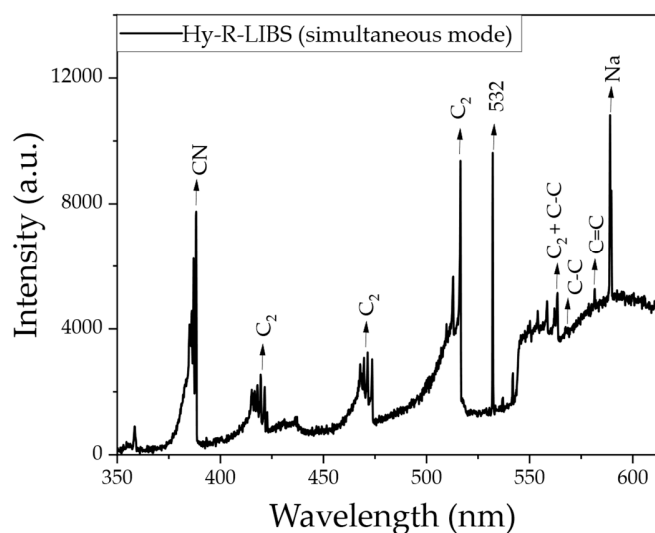

**Figure S1.** The average of ten simultaneous signals from Hy-R-LIBS system obtained from PS beads.

(a)

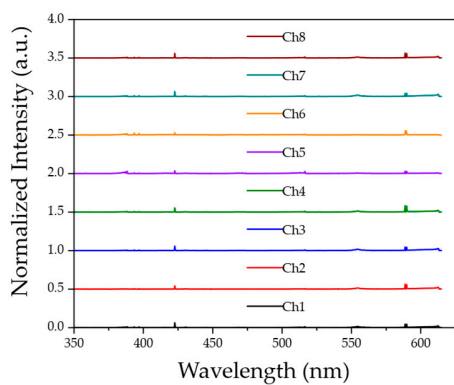

(b)

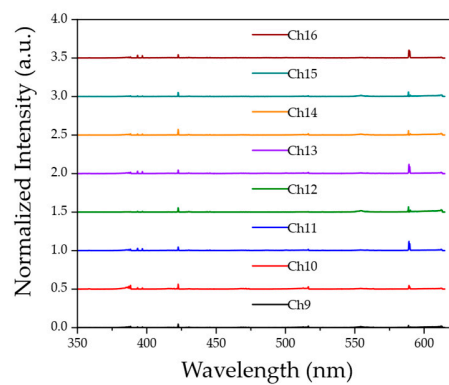

**Figure S2.** Averaged and normalized spectra of 16 cheese samples using the LIBS system for (a) 8 cheese samples, and (b) 8 other cheese samples.

(a)

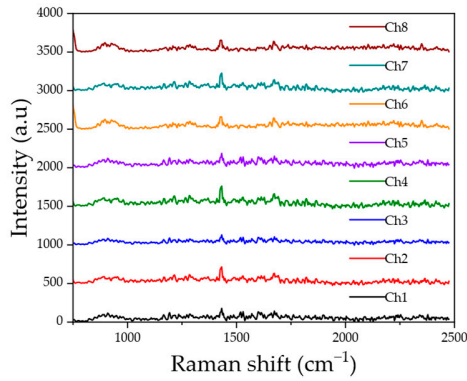

(b)

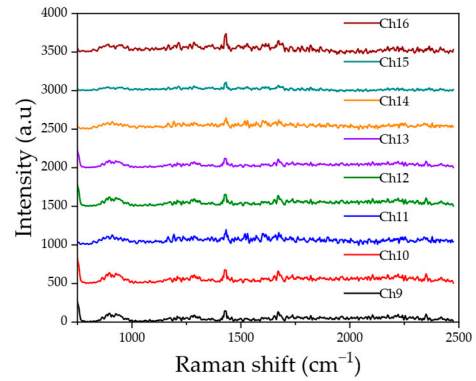

**Figure S3.** Averaged spectra of 16 cheese samples using the Raman spectroscopy system for (a) 8 cheese samples, and (b) other 8 cheese samples.

(a)

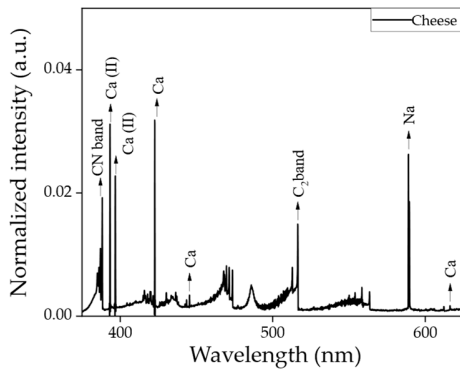

(b)

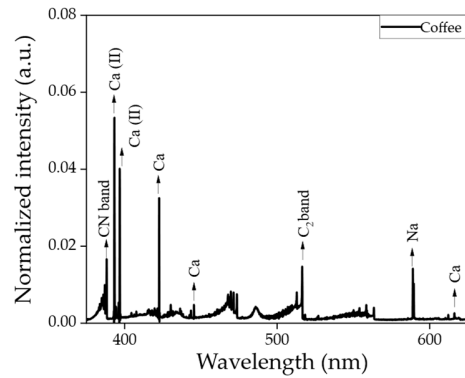

**Figure S4.** Averaged and normalized LIBS spectra of (a) all 16 cheese samples, and (b) all 7 coffee varieties obtained using a commercially available instrument (Z-900). Note that corresponding spectral range (350-625 nm) was selected.

(a)

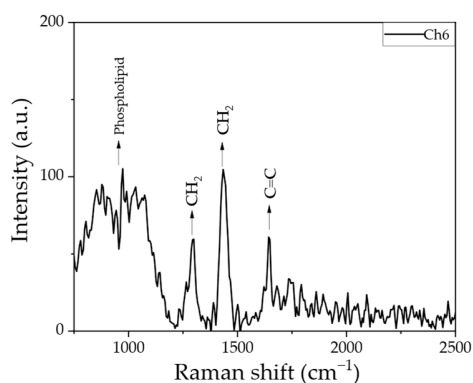

(b)

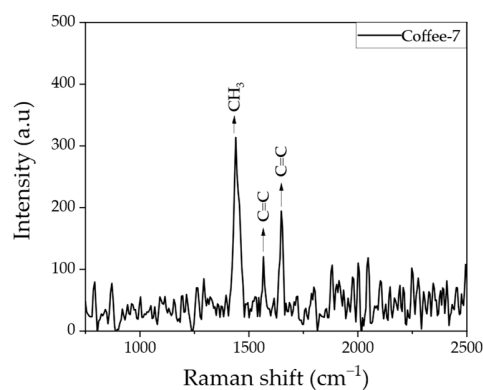

**Figure S5.** The averaged Raman spectrum for (a) a cheese sample (Ch6), and (b) a coffee sample (C7) collected using a commercially available instrument (Alpha300). Note that corresponding spectral range ( $750\text{-}2500\text{ cm}^{-1}$ ) was selected.

|              |      | Target class |     |     |     |     |     |     |     |     |      |      |      |      |      |      |      |
|--------------|------|--------------|-----|-----|-----|-----|-----|-----|-----|-----|------|------|------|------|------|------|------|
|              |      | Ch1          | Ch2 | Ch3 | Ch4 | Ch5 | Ch6 | Ch7 | Ch8 | Ch9 | Ch10 | Ch11 | Ch12 | Ch13 | Ch14 | Ch15 | Ch16 |
| Output class | Ch1  | 98           | 0   | 0   | 1   | 0   | 0   | 0   | 0   | 1   | 0    | 0    | 0    | 0    | 0    | 0    | 0    |
|              | Ch2  | 0            | 90  | 0   | 1   | 0   | 0   | 2   | 1   | 1   | 2    | 3    | 0    | 0    | 0    | 0    | 0    |
|              | Ch3  | 0            | 0   | 95  | 1   | 0   | 0   | 2   | 0   | 0   | 0    | 1    | 0    | 0    | 0    | 1    | 0    |
|              | Ch4  | 2            | 3   | 1   | 88  | 0   | 0   | 0   | 1   | 2   | 2    | 1    | 0    | 0    | 0    | 0    | 0    |
|              | Ch5  | 0            | 0   | 2   | 0   | 94  | 1   | 0   | 0   | 1   | 1    | 0    | 0    | 0    | 0    | 0    | 1    |
|              | Ch6  | 0            | 0   | 0   | 0   | 1   | 95  | 0   | 0   | 0   | 0    | 0    | 0    | 1    | 2    | 1    | 0    |
|              | Ch7  | 0            | 0   | 2   | 3   | 3   | 2   | 84  | 0   | 1   | 0    | 0    | 0    | 1    | 3    | 1    | 0    |
|              | Ch8  | 0            | 1   | 0   | 2   | 0   | 1   | 3   | 90  | 1   | 0    | 0    | 0    | 2    | 0    | 0    | 0    |
|              | Ch9  | 0            | 0   | 0   | 1   | 0   | 0   | 2   | 2   | 88  | 3    | 0    | 0    | 0    | 1    | 2    | 1    |
|              | Ch10 | 0            | 1   | 0   | 1   | 2   | 1   | 1   | 0   | 1   | 86   | 1    | 0    | 1    | 2    | 1    | 2    |
|              | Ch11 | 0            | 1   | 0   | 0   | 0   | 0   | 2   | 1   | 0   | 2    | 94   | 0    | 0    | 0    | 0    | 0    |
|              | Ch12 | 0            | 0   | 0   | 0   | 0   | 0   | 0   | 0   | 0   | 0    | 0    | 100  | 0    | 0    | 0    | 0    |
|              | Ch13 | 0            | 2   | 0   | 0   | 0   | 0   | 0   | 3   | 0   | 0    | 0    | 0    | 94   | 0    | 0    | 1    |
|              | Ch14 | 0            | 1   | 0   | 2   | 0   | 0   | 2   | 1   | 2   | 0    | 0    | 0    | 0    | 92   | 0    | 0    |
|              | Ch15 | 0            | 0   | 0   | 0   | 0   | 0   | 2   | 1   | 0   | 3    | 0    | 0    | 0    | 0    | 94   | 0    |
|              | Ch16 | 0            | 1   | 0   | 0   | 0   | 0   | 0   | 0   | 2   | 1    | 0    | 0    | 1    | 0    | 0    | 95   |

**Figure S6.** An example of a confusion matrix calculated for all the tested cheese varieties using the ENET classifier. Note that this training/testing process was repeated 10 times to produce the results reported in Table 1.

|              |    | Target class |    |    |     |    |    |    |
|--------------|----|--------------|----|----|-----|----|----|----|
|              |    | C1           | C2 | C3 | C4  | C5 | C6 | C7 |
| Output class | C1 | 93           | 1  | 0  | 0   | 3  | 3  | 0  |
|              | C2 | 4            | 91 | 2  | 0   | 3  | 0  | 0  |
|              | C3 | 0            | 3  | 95 | 0   | 2  | 0  | 0  |
|              | C4 | 0            | 0  | 0  | 100 | 0  | 0  | 0  |
|              | C5 | 2            | 3  | 3  | 0   | 89 | 2  | 1  |
|              | C6 | 1            | 2  | 0  | 0   | 2  | 95 | 0  |
|              | C7 | 0            | 0  | 0  | 0   | 1  | 0  | 99 |

**Figure S7.** An example of a confusion matrix calculated for the tested coffee varieties using the ENET classifier. Note that this training/testing process was repeated 10 times to produce the results reported in Table 2.
